# Supplementary material
Source: PubMed Central journal article supplement (PMC4003460)

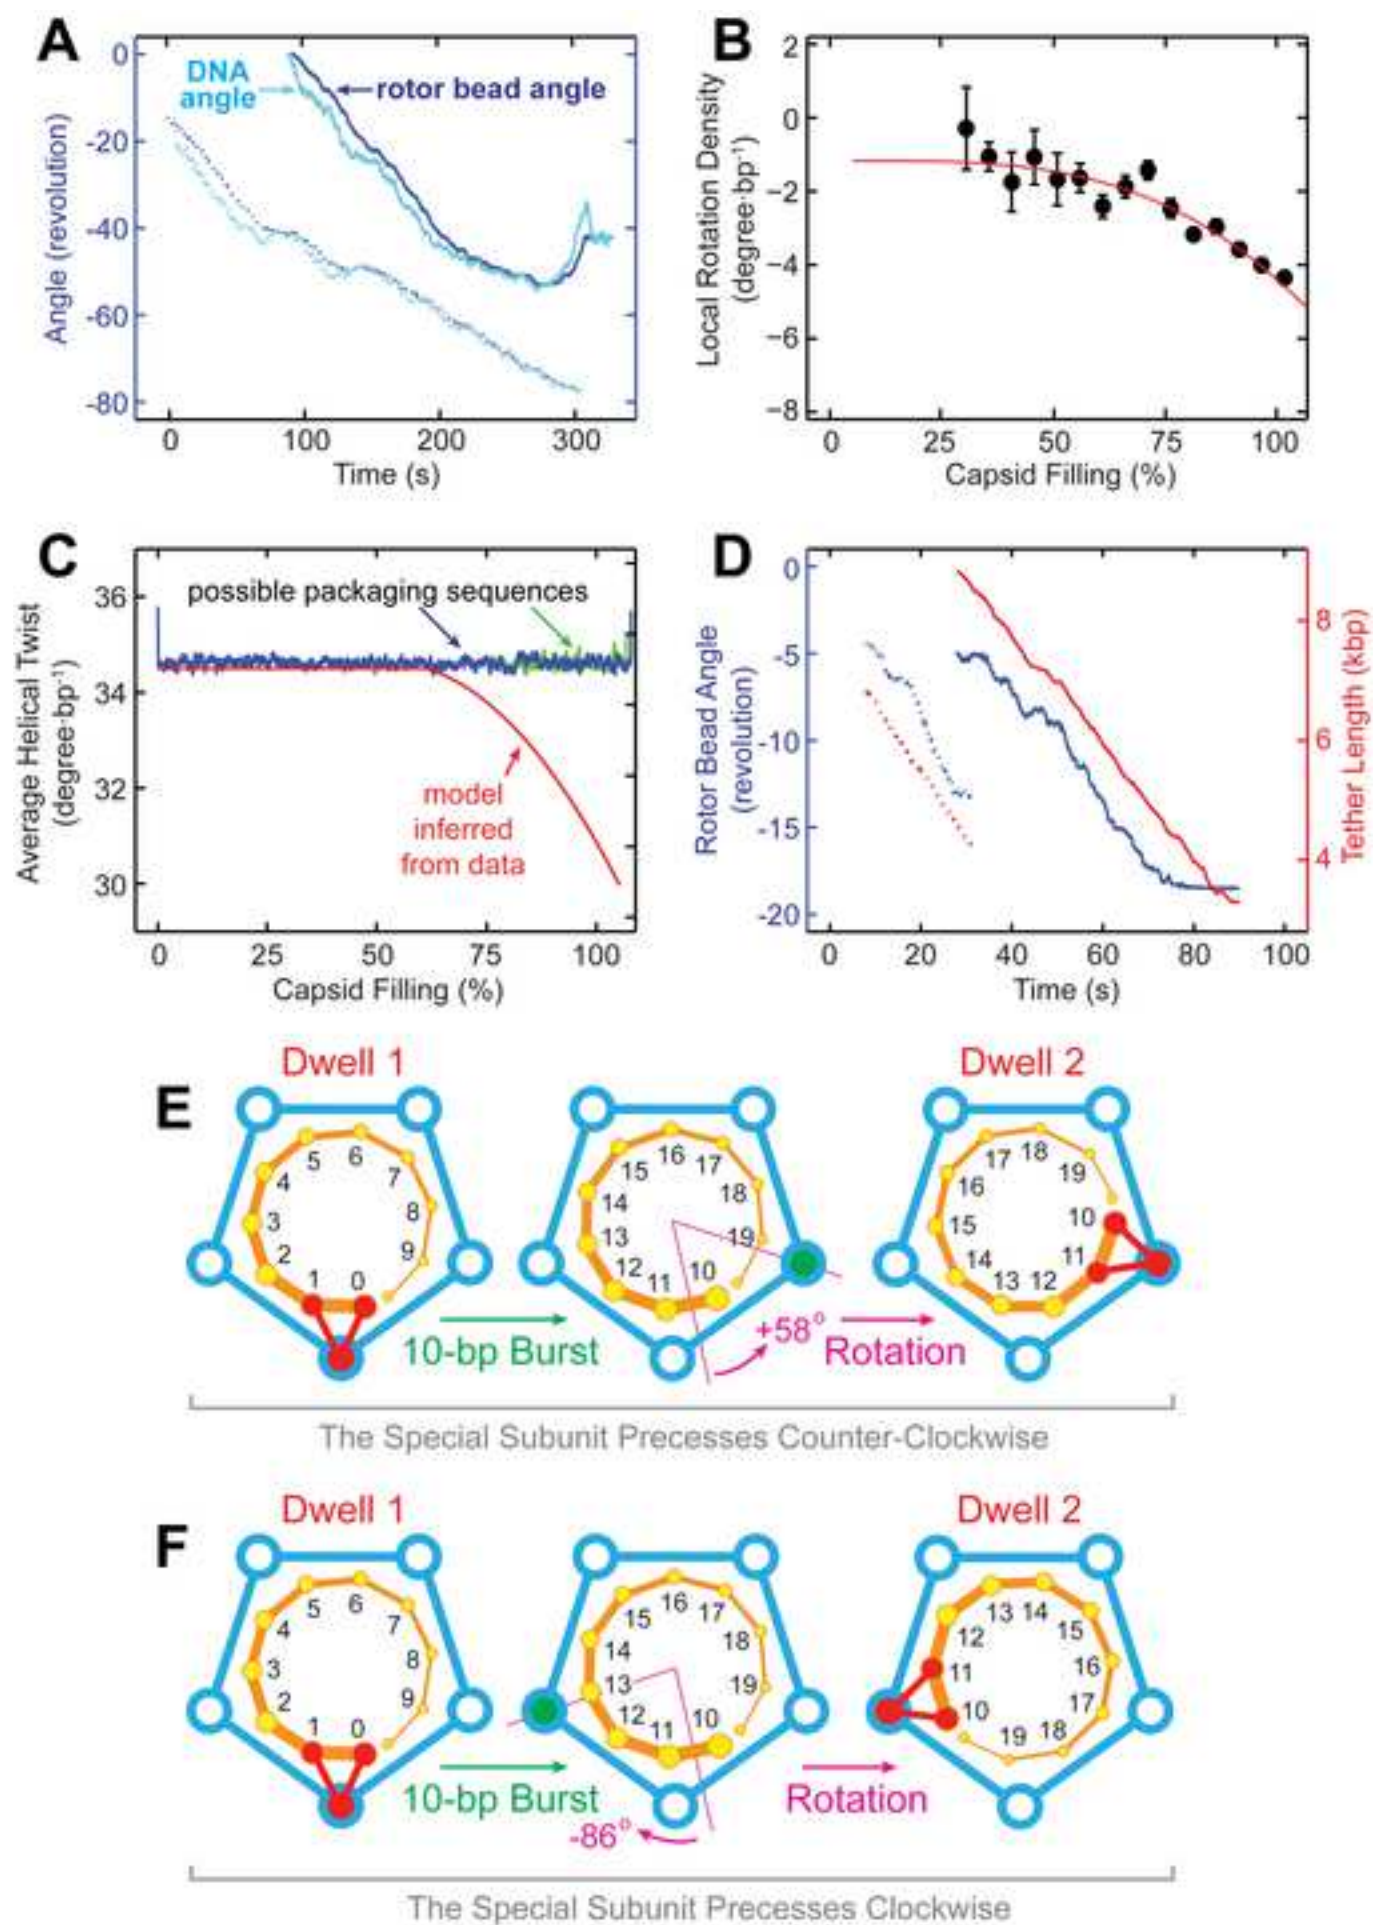

Figure S2

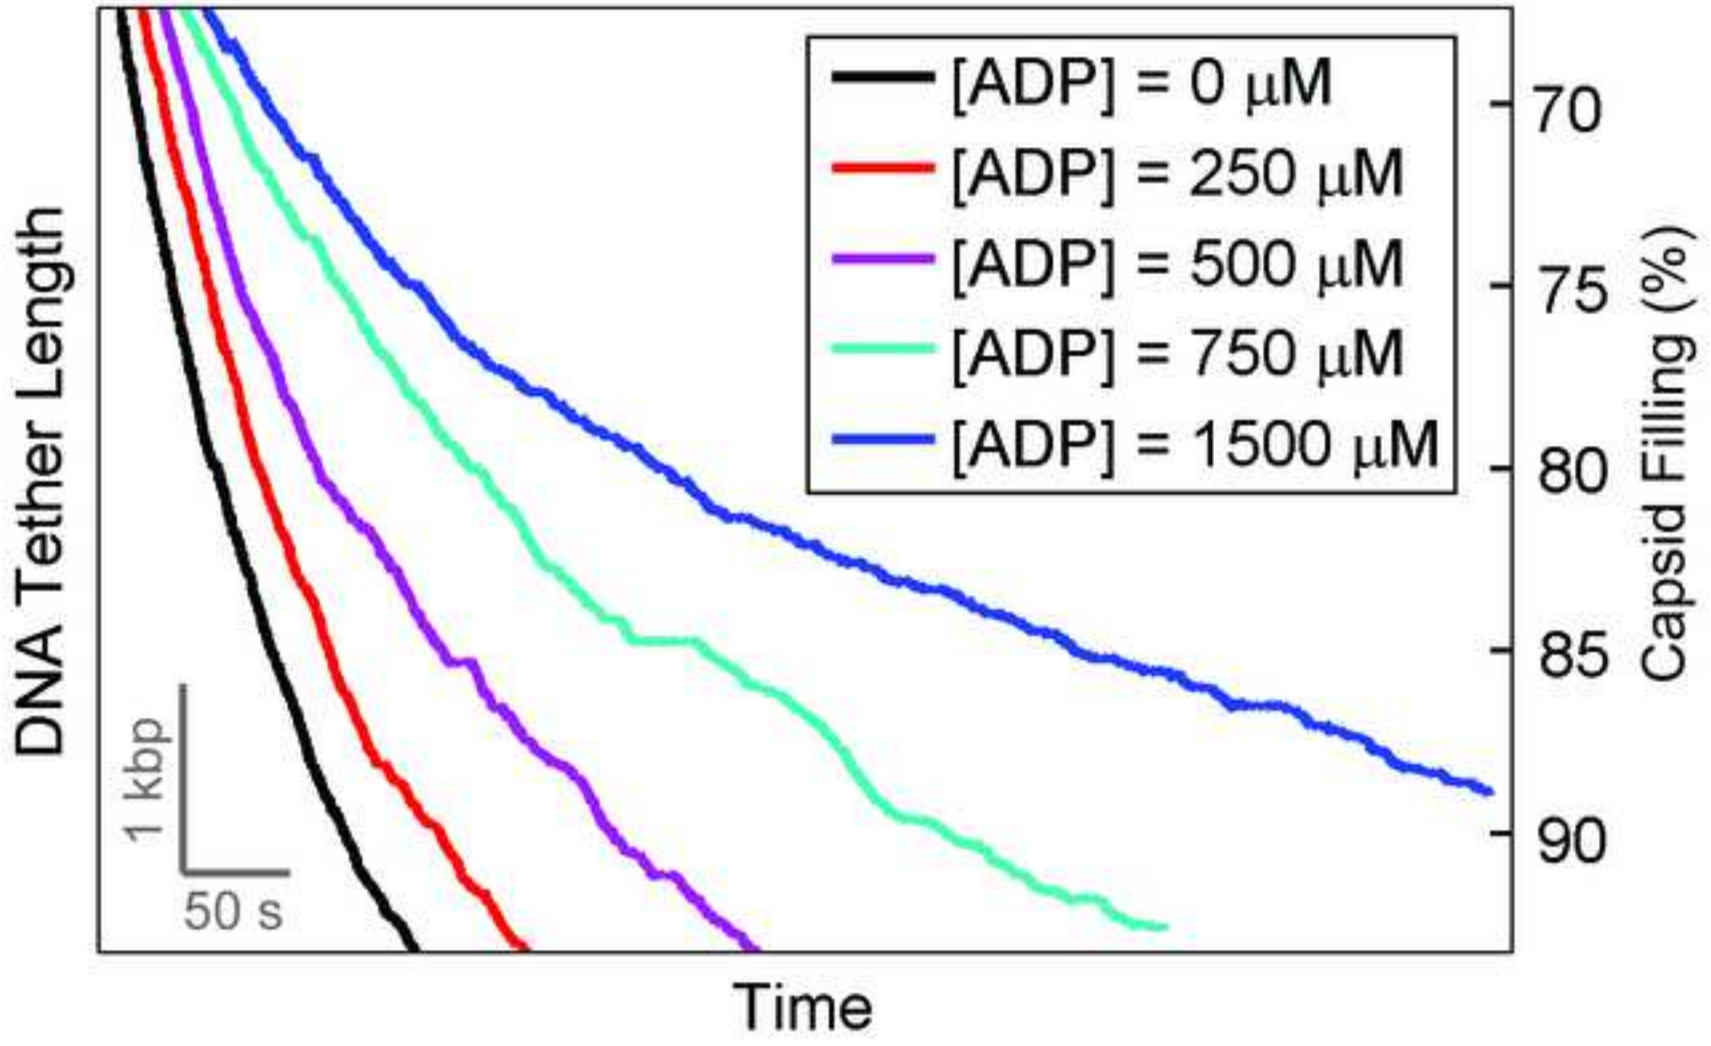

Figure S3

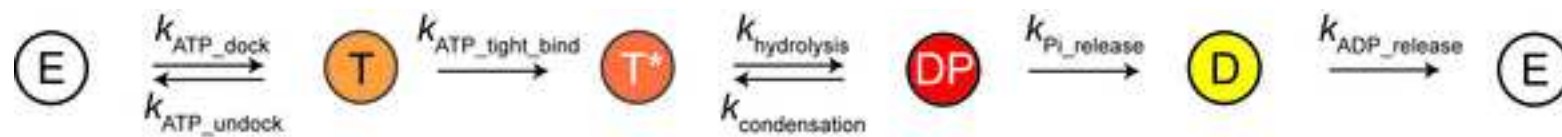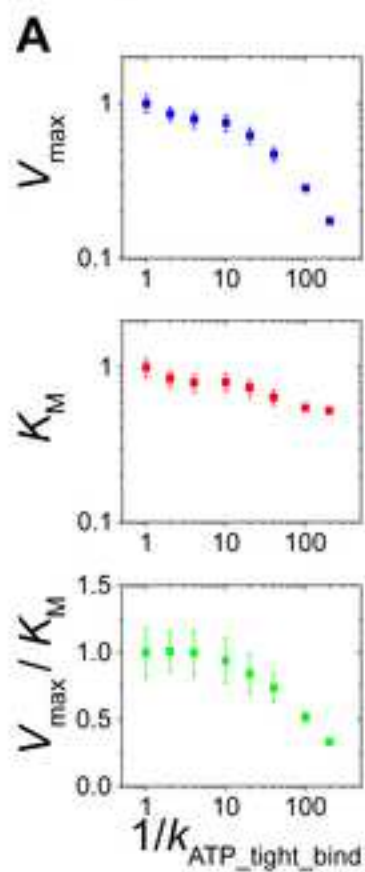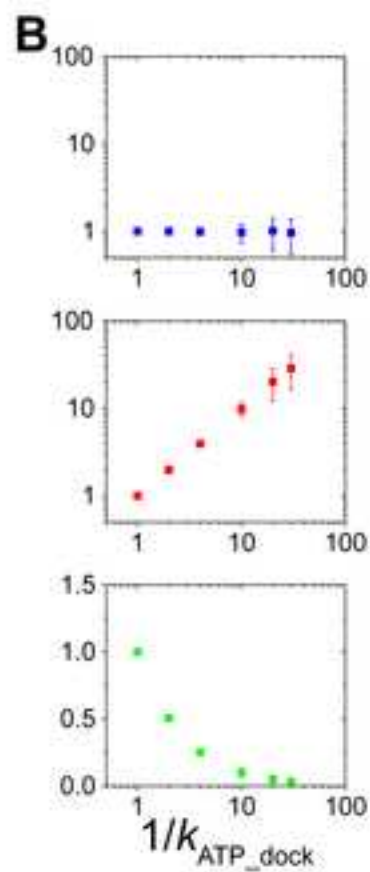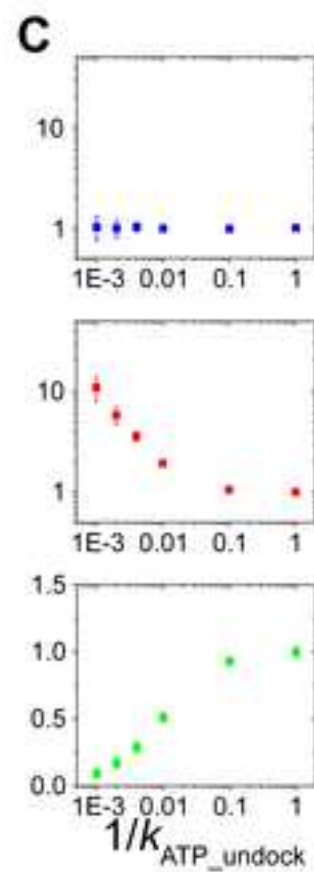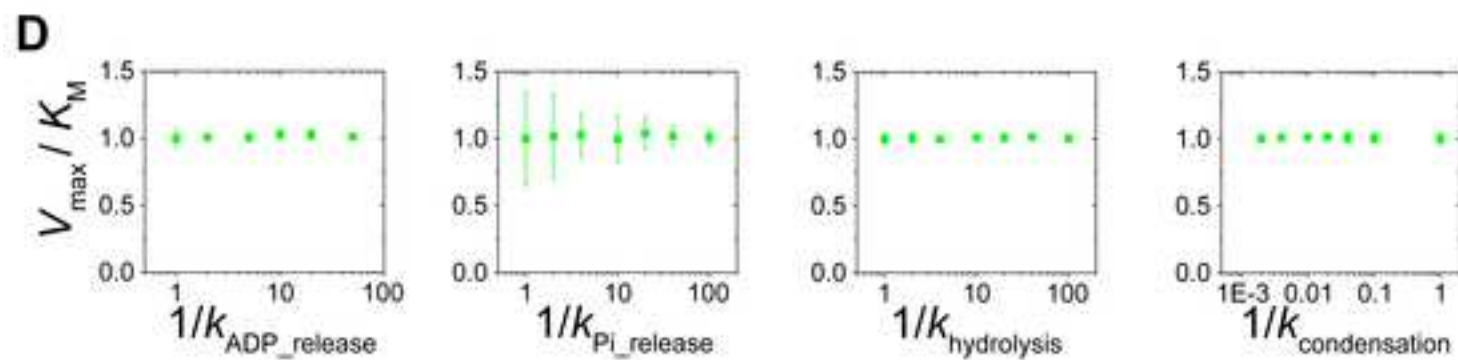

Figure S4

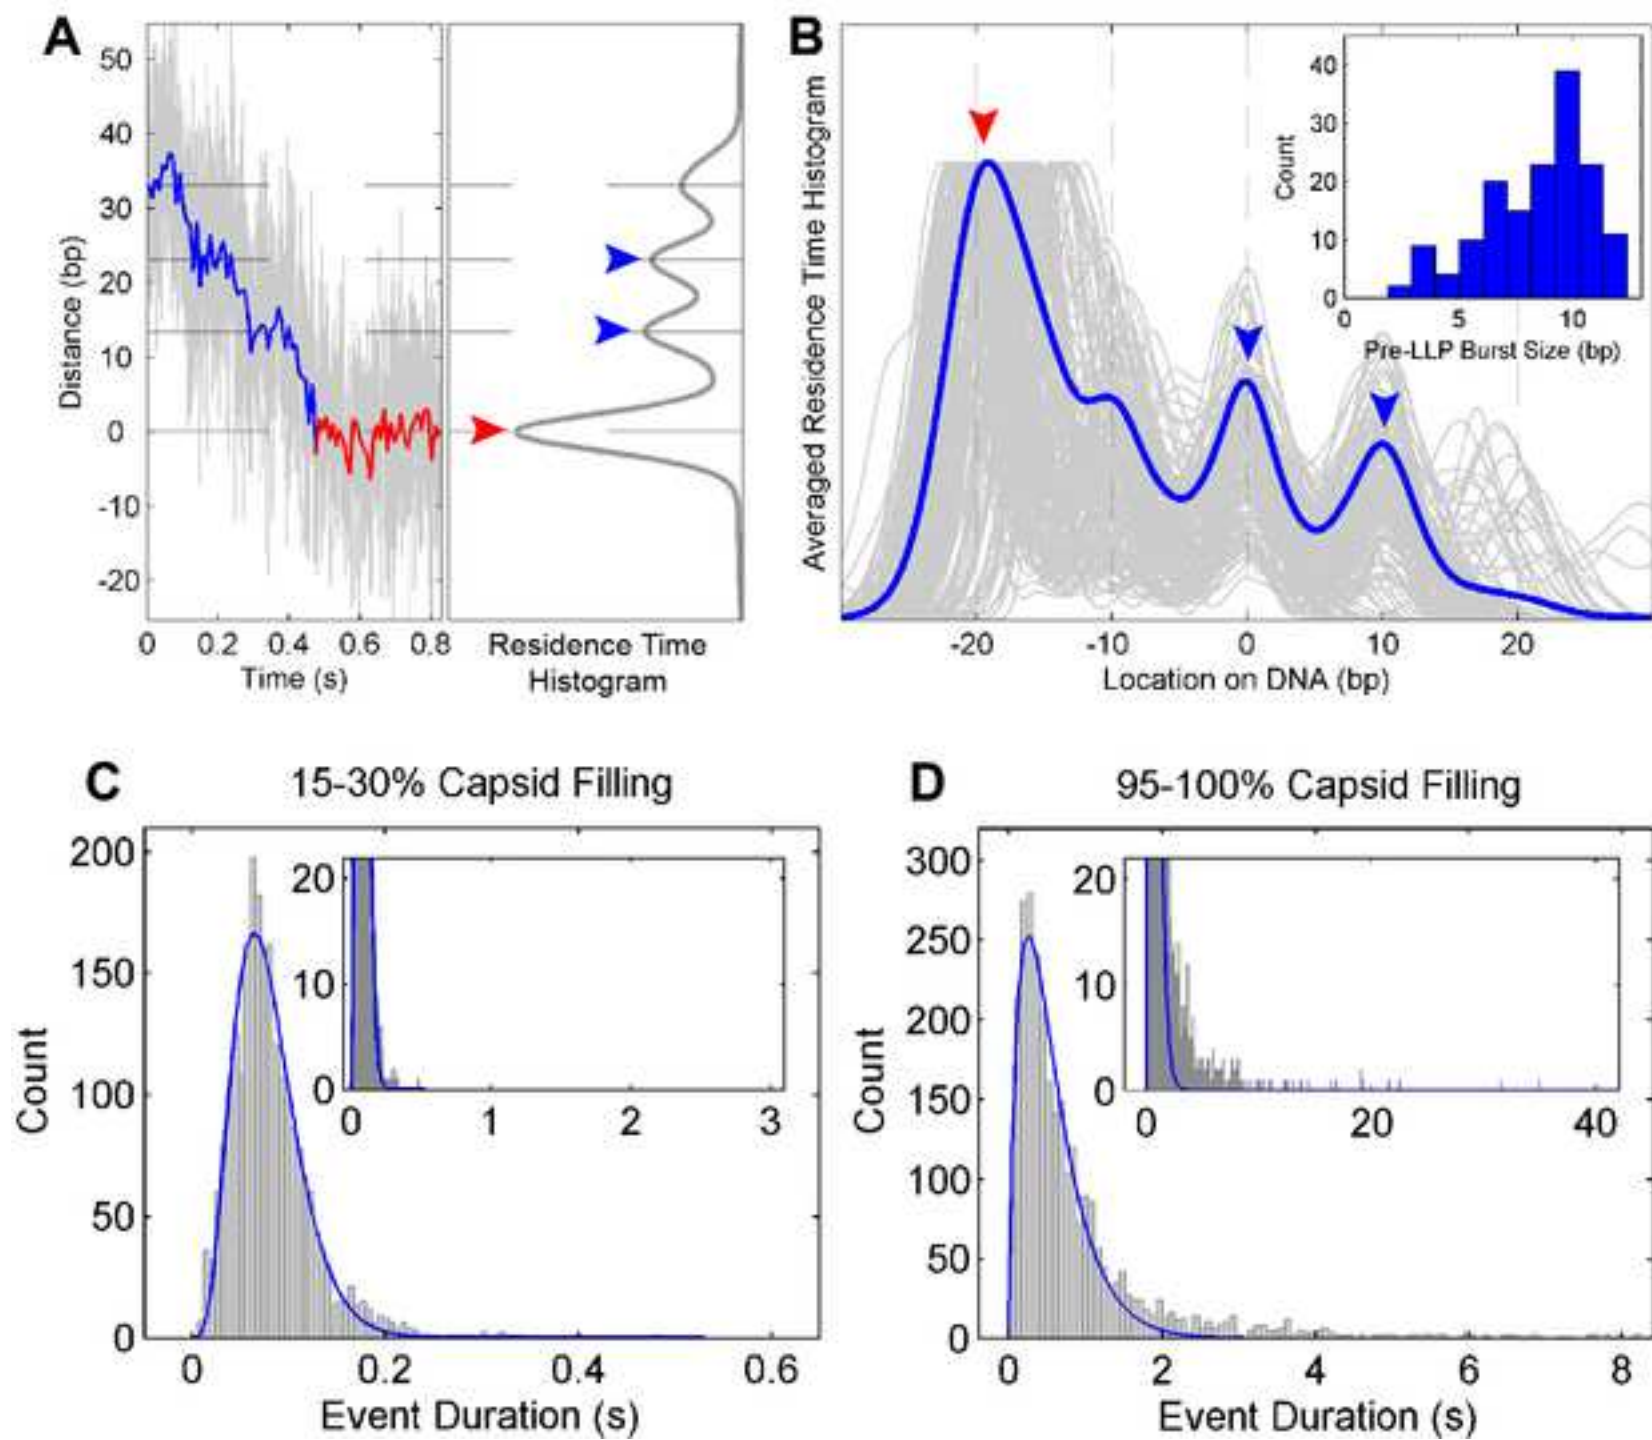

Figure S5

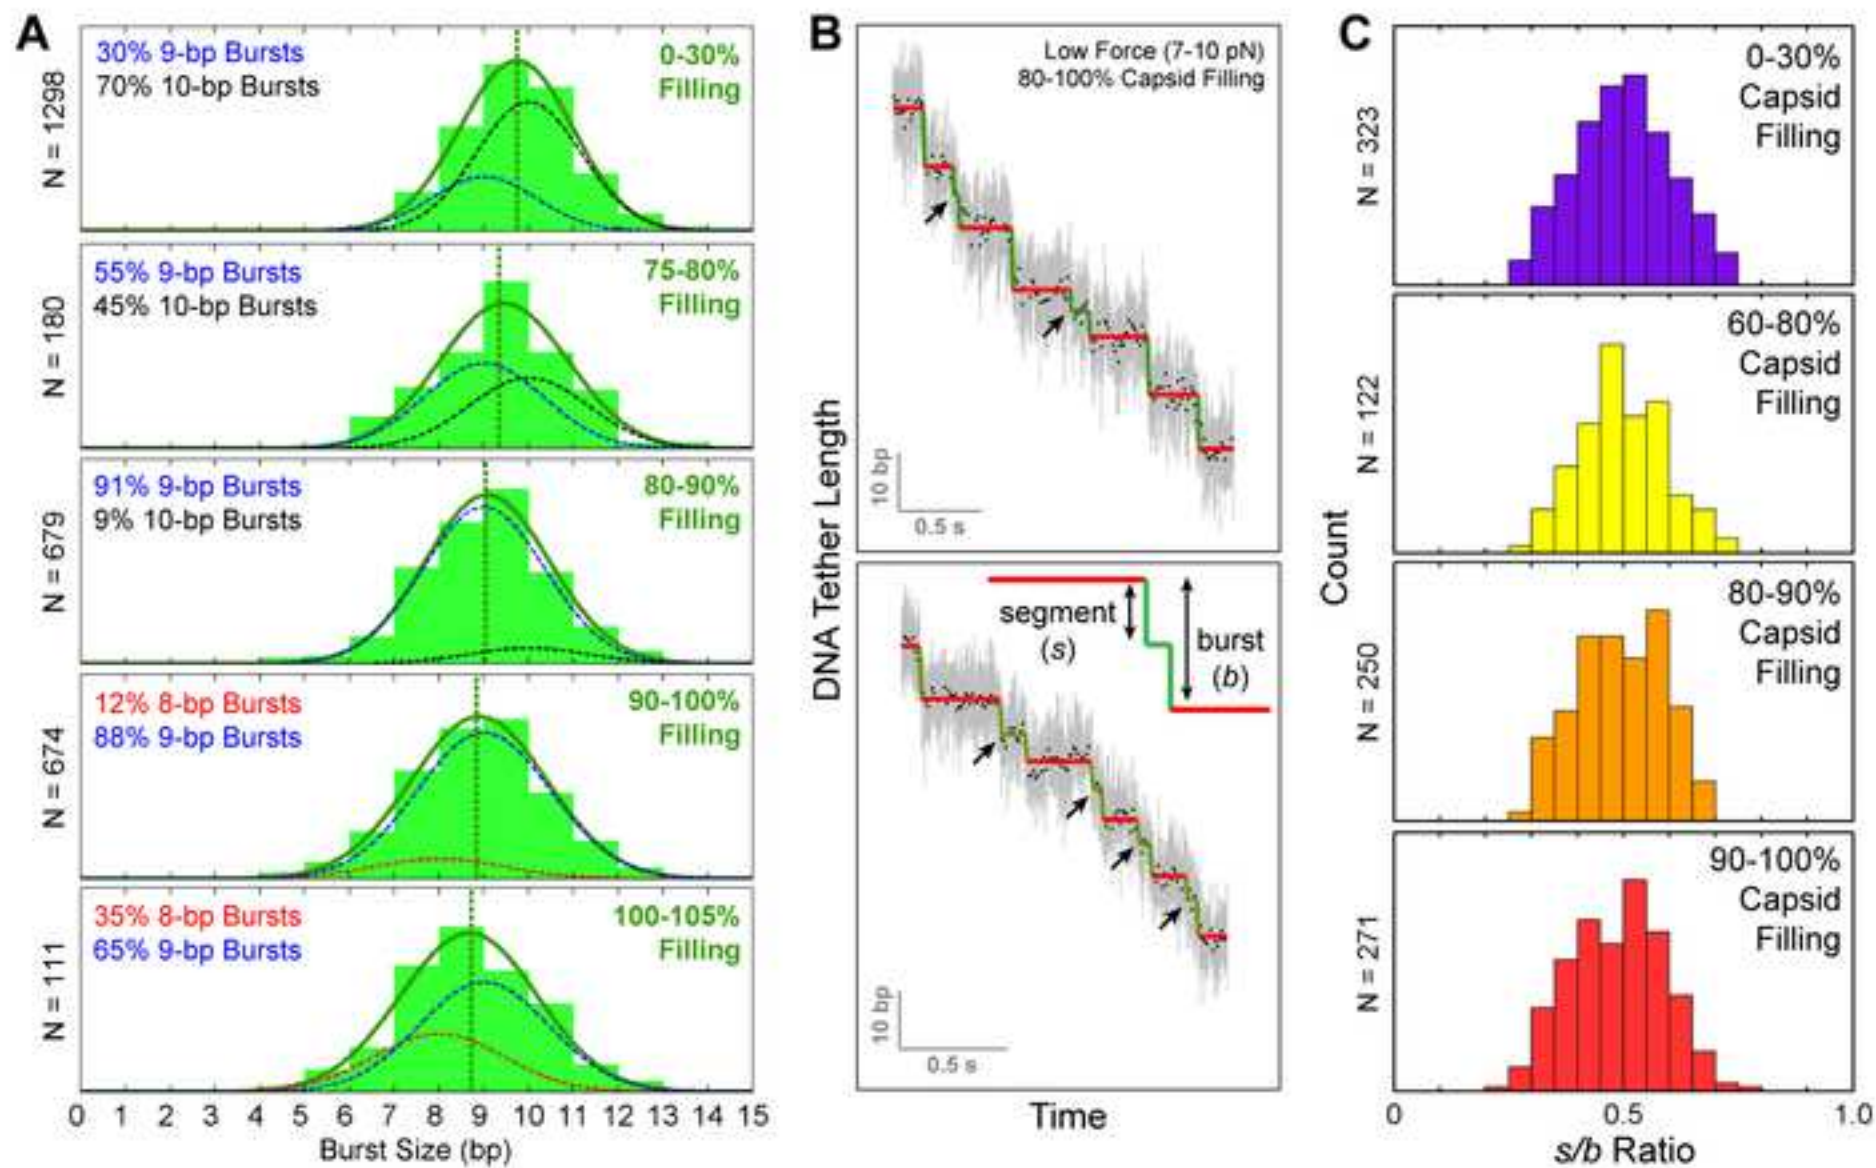

Supplement: NIHMS570026-supplement-02.pdf [file NIHMS570026-supplement-02.pdf]
